# Supplementary material
Source: publisher figshare collection journal article supplement (https://asha.figshare.com/articles/dataset/_/6170489)
Supplement: Supplementary file 1 [file 1]

Supplemental Table A. Participant characteristics, diagnostic measures and criteria.

| Study ID | Study authors               | TD: <i>N</i> (m/f)<br>Age        | LI: <i>N</i> (m/f)<br>Age        | Reference standard<br>(cutoff score)                                             | Nonverbal cognition |
|----------|-----------------------------|----------------------------------|----------------------------------|----------------------------------------------------------------------------------|---------------------|
| 1.       | Archibald & Joannis (2009)  | 62 (n/a) <sup>a</sup><br>5;4-9;5 | 26 (n/a) <sup>a</sup><br>5;4-9;5 | CELF-4 (-1 SD) <sup>b</sup>                                                      | Not used            |
| 2.       | Bedore & Leonard (1998)     | 19 (n/a) <sup>c</sup>            | 19 (n/a)<br>3;7-5;9              | Diagnosis, TOLD-P/<br>TOLD-P2/PLS-3<br>(-1 SD)                                   | ≥ 85                |
| 3.       | Conti-Ramsden (2003)        | 32 (17/15)<br>M = 4;9            | 32 (25/7)<br>M = 5;1             | Diagnosis,<br>intervention                                                       | LI > 80             |
| 4.       | Conti-Ramsden et al. (2001) | 100 (49/51)<br>M = 10;9          | 160<br>(117/43)<br>M = 10;9      | Diagnosis,<br>intervention at age 7 <sup>d</sup>                                 | > 70                |
| 5.       | Deevy et al. (2010)         | 47 (28/19)<br>M = 5;0            | 29 (18/11)<br>M = 5;0            | Diagnosis, SPELT-2<br>(LI <1 <sup>st</sup> , TD >18 <sup>th</sup><br>percentile) | ≥ 85                |
| 6.       | Dollaghan & Campbell (1998) | 41 (25/16)<br>5;8-12;2           | 44 (31/13)<br>5;8-12;2           | Intervention                                                                     | Not used            |
| 7.       | Eisenberg & Guo (2013)      | 17 (10/7)<br>3;0-3;11            | 17 (10/7)<br>3;0-3;11            | Diagnosis/parent<br>checklist, SPELT-P2                                          | ≥ 85                |

|                                                                                                                                                                                                                                                                                                                                                                                                                               |                                   |                                                 |                                                |                                                                                    |      |
|-------------------------------------------------------------------------------------------------------------------------------------------------------------------------------------------------------------------------------------------------------------------------------------------------------------------------------------------------------------------------------------------------------------------------------|-----------------------------------|-------------------------------------------------|------------------------------------------------|------------------------------------------------------------------------------------|------|
|                                                                                                                                                                                                                                                                                                                                                                                                                               |                                   |                                                 |                                                | (-0.86 SD) <sup>e</sup>                                                            |      |
| 8.                                                                                                                                                                                                                                                                                                                                                                                                                            | Ellis Weismer<br>et al. (2000)    | 417<br>(240/177)<br><br>M = 7;11                | 164 (89/75)<br><br>M = 7;11                    | PPVT-R, CREVT,<br><br>CELF-3 (-1.25 SD)                                            | > 70 |
| 9.                                                                                                                                                                                                                                                                                                                                                                                                                            | Gladfelter &<br>Leonard<br>(2012) | 15 (10/5)<br>M = 4;3<br><br>15 (9/6)<br>M = 5;2 | 12 (6/6)<br>M = 4;3<br><br>13 (8/5)<br>M = 5;3 | Diagnosis, SPELT-2<br>(LI < 1 <sup>st</sup> , TD > 18 <sup>th</sup><br>percentile) | ≥ 85 |
| 10.                                                                                                                                                                                                                                                                                                                                                                                                                           | Gray (2003)                       | 22 (17/5)<br>M = 5;0                            | 22 (17/5)<br>M = 5;0                           | Diagnosis/intervention<br>(LI 2 tests < -1.5 SD)                                   | ≥ 75 |
| 11.                                                                                                                                                                                                                                                                                                                                                                                                                           | Jones Moyle et<br>al. (2011)      | 50 (24/26)<br>M = 7;9                           | 50 (26/24)<br>M = 7;9                          | Diagnosis, PPVT-R/<br>TACL-R (-1 SD)                                               | ≥ 85 |
| 12.                                                                                                                                                                                                                                                                                                                                                                                                                           | Poll et al.<br>(2010)             | 18 (9/9)<br>M = 21                              | 13 (6/7)<br>M = 21                             | TOAL-3 SLQ/PPVT<br>(-1SD), TOAL-3<br>subtest (-2 SD)                               | ≥ 80 |
| 13.                                                                                                                                                                                                                                                                                                                                                                                                                           | Redmond et<br>al. (2011)          | 20 (11/9)<br>M = 7;10                           | 20 (12/8)<br>M = 7;10                          | Diagnosis,<br>intervention,<br>CELFST-4 <sup>f</sup>                               | ≥ 80 |
| <hr/> <p>CELF-4=Clinical Evaluation of Language Fundamentals –4 (Semel et al., 2003), TOLD-P=Test of Language Development–Primary (Newcomer &amp; Hammill, 1982, 1988), PLS-3=Preschool Language Scale-3 (Zimmerman et al., 1992), SPELT-2=Structured Photographic Expressive Language Test-2 (Werner &amp; Krescheck, 1983), SPELT-P2=Structured Photographic Expressive Language Test-2 Preschool (Dawson et al.,</p> <hr/> |                                   |                                                 |                                                |                                                                                    |      |

---

2005), PPVT-R=Peabody Picture Vocabulary Test-Revised (Dunn & Dunn, 1981), CREVT=Comprehensive Receptive and Expressive Vocabulary Test (Wallace & Hammill, 1994), CELF-3=Clinical Evaluation of Language Fundamentals –3 (Semel et al., 1995), TACL-R=Test for Auditory Comprehension of Language-Revised (Carrow-Woolfolk, 1985), TOAL-3=Test of Adolescent and Adult Language-3 (Hammill et al., 1994), CELFST-4=Clinical Evaluation of Language Fundamentals-4 Screening Test (Semel et al., 2004).

<sup>a</sup> There were 40 male and 48 female participants in both groups combined. <sup>b</sup> Participants with scores between 15<sup>th</sup> and 35<sup>th</sup> percentile on NRT and SR were excluded. <sup>c</sup> Each TD participant was matched within 2 months of the age of a participant with LI. <sup>d</sup> Eleven percent of children with LI had normal scores on all language assessments at age 10;9. <sup>e</sup> Diagnosis served as reference standard for 11 children with LI, parent checklist and SPELT-P2 was used for 6 participants with LI. Excluded were children with LI who did not use sentences and TD children with SPELT-P2 scores > +1SD. <sup>f</sup> The screener cutoff score was used.

---

## References

- Carrow-Woolfolk, E. (1985). *Test for Auditory Comprehension of Language-Revised*. Allen, TX:DLM Teaching Resources.
- Dawson, J., Eyer, J. A., & Fonkalsrud, J. (2005). *Structured Photographic Expressive Language Test-Preschool, Second Edition*. DeKalb, IL: Janelle Publications.
- Dunn, L., & Dunn, L. (1981). *Peabody Picture Vocabulary Test-Revised*. Circle Pine, MN: American Guidance Service.

- Hammill, D. D., Brown, V. L., Larsen, S. C., & Wiederholt, J. L. (1994). *Test of Adolescent and Adult Language – Third Edition*. Austin, TX: Pro-Ed.
- Newcomer, P., & Hammill, D. (1982). *Test of Language Development – Primary*. Austin, TX: Pro-Ed.
- Newcomer, P., & Hammill, D. (1988). *Test of Language Development – 2 Primary*. Austin, TX: Pro-Ed.
- Semel, E., Wiig, E., & Secord, W. (1995). *Clinical Evaluation of Language Fundamentals – Third Edition*. San Antonio, TX: The Psychological Corporation.
- Semel, E., Wiig, E., & Secord, W. (2003). *Clinical Evaluation of Language Fundamentals – Fourth Edition*. San Antonio, TX: The Psychological Corporation.
- Semel, E., Wiig, E., & Secord, W. (2004). *Clinical Evaluation of Language Fundamentals – Fourth Edition Screening Test*. San Antonio, TX: Harcourt Assessment.
- Wallace, G., & Hammill, D. (1994). *Comprehensive Receptive and Expressive Vocabulary Test*. Austin, TX: Pro-Ed.
- Werner, E. O., & Krescheck, J. D. (1983). *Structured Photographic Expressive Language Test-Second Edition*. DeKalb, IL: Janelle Publications.
- Zimmerman, I., Steiner, V., & Pond, R. (1992). *Preschool Language Scale-3*. San Antonio: The Psychological Corporation.
