# Supplementary material
Source: publisher figshare collection journal article supplement (https://asha.figshare.com/articles/dataset/_/6170489)
Supplement: Supplementary file 2 [file 1]

Supplemental Table B. Tense measures, cutoff scores and diagnostic accuracy data.

| Study ID <sup>a</sup> | Marker measure | Cutoff score                | TP  | FP | FN | TN | Sensitivity (95% CI) | Specificity (95% CI) |
|-----------------------|----------------|-----------------------------|-----|----|----|----|----------------------|----------------------|
| 2.                    | FVMC           | n/a                         | 16  | 0  | 3  | 19 | 84 (60-97)           | 100 (82-100)         |
| 3.                    | PTT            | 25 <sup>th</sup> percentile | 15  | 3  | 6  | 29 | 71 (48-89)           | 91 (75-98)           |
| 4.                    | PTT            | 16 <sup>th</sup> percentile | 114 | 11 | 40 | 89 | 74 (66-81)           | 89 (81-94)           |
|                       | TPS            | 16 <sup>th</sup> percentile | 98  | 10 | 57 | 90 | 63 (55-71)           | 90 (82-95)           |
| 7.                    | PVT            | 85% morphemes               | 17  | 3  | 0  | 14 | 100 (81-100)         | 82 (57-96)           |
| 9.                    | FVMC(4)        | 84% morphemes               | 12  | 0  | 0  | 15 | 100 (74-100)         | 100 (78-100)         |
|                       | FVMC(5)        | 85% morphemes               | 10  | 2  | 2  | 13 | 92 (64-100)          | 87 (60-98)           |
|                       | TMT(4)         | 7 (raw score)               | 8   | 2  | 4  | 13 | 77 (46-95)           | 87 (60-98)           |
|                       | TMT(5)         | 8 (raw score)               | 11  | 3  | 2  | 12 | 67 (35-90)           | 80 (52-96)           |
|                       | PS(4)          | 12 (raw score)              |     |    |    |    | 85 (55-98)           |                      |
|                       | PS(5)          | 16 (raw score)              |     |    |    |    |                      |                      |
| 11.                   | FVMC           | n/a                         | 25  | 7  | 25 | 43 | 50 (36-65)           | 86 (73-94)           |
| 12.                   | GJ-S           | 0.90 (A')                   | 3   | 0  | 10 | 18 | 23 (5-54)            | 100 (82-100)         |
|                       | GJ-C           | 0.95 (A')                   | 7   | 1  | 6  | 17 | 54 (25-81)           | 94 (73-100)          |
| 13.                   | TEGI           | 96 (raw score)              | 17  | 1  | 3  | 19 | 85 (62-97)           | 95 (75-100)          |

<sup>a</sup> Study ID is based on the alphabetical list included in Table 1 and in the Appendix.

TP=true positive, FP=false positive, FN=false negative, TN=true negative,  
Sensitivity=TP/TP+FN, Specificity=TN/TN+FP, FVMC=Finite Verb Morphology  
Composite (Leonard et al., 1999), PTT=Past Tense Task (Marchman et al., 1999),  
TPS=Third Person Singular task (Simkin & Conti-Ramsden, 2001), PVT=Percent Verb  
Tense usage, TMT=Tense Marker Total (Hadley & Short, 2005), PS=Productivity Score  
(Hadley & Short, 2005), GJ-S= Grammaticality Judgment of tense omission in simple  
sentences, GJ-C=Grammaticality Judgment of tense omission in complex sentences,  
TEGI=Rice/Wexler Test of Early Grammatical Impairment (Rice & Wexler, 2001).
