# Supplementary material
Source: publisher figshare collection journal article supplement (https://asha.figshare.com/articles/dataset/_/6170489)
Supplement: Supplementary file 3 [file 1]

Supplemental Table D. Sentence repetition measures, cutoff scores and diagnostic accuracy data.

| Study           | Marker  | Cutoff score                | TP  | FP | FN | TN | Sensitivity | Specificity |
|-----------------|---------|-----------------------------|-----|----|----|----|-------------|-------------|
| ID <sup>a</sup> | measure |                             |     |    |    |    | (95% CI)    | (95% CI)    |
| 1.              | SR      | 10 <sup>th</sup> percentile | 22  | 6  | 4  | 56 | 85 (65-96)  | 90 (80-96)  |
| 4.              | RecS    | 16 <sup>th</sup> percentile | 144 | 15 | 16 | 85 | 90 (84-94)  | 85 (77-91)  |
| 12.             | RecS    | 63 (raw score)              | 11  | 2  | 2  | 16 | 85 (55-98)  | 89 (65-99)  |
| 13.             | SR      | 15 (raw score)              | 18  | 2  | 2  | 18 | 90 (68-99)  | 90 (68-99)  |

<sup>a</sup> Study ID is based on the alphabetical list included in Table 1 and in the Appendix.

TP=true positive, FP=false positive, FN=false negative, TN=true negative, Sensitivity=TP/TP+FN, Specificity=TN/TN+FP, SR=Sentence Recall (Redmond, 2005), RecS=Recalling Sentences (CELF-R, Semel et al., 1994).
