# Supplementary material
Source: publisher figshare collection journal article supplement (https://asha.figshare.com/articles/dataset/_/6170489)
Supplement: Supplementary file 4 [file 1]

Supplemental Table C. Nonword repetition measures, cutoff scores and diagnostic accuracy data.

| Study ID <sup>a</sup> | Marker measure | Cutoff score                | TP  | FP  | FN | TN  | Sensitivity (95% CI) | Specificity (95% CI) |
|-----------------------|----------------|-----------------------------|-----|-----|----|-----|----------------------|----------------------|
| 1.                    | NRT            | 15 <sup>th</sup> percentile | 12  | 23  | 14 | 39  | 46 (27-67)           | 63 (50-75)           |
| 3.                    | CNRep          | 25 <sup>th</sup> percentile | 21  | 0   | 11 | 32  | 66 (47-81)           | 100 (89-100)         |
| 4.                    | CNRep          | 16 <sup>th</sup> percentile | 124 | 13  | 35 | 87  | 78 (71-84)           | 87 (79-93)           |
| 5.                    | NRT            | 66% phonemes                | 25  | 4   | 4  | 43  | 86 (68-96)           | 92 (80-98)           |
|                       | NRT adj.       | 68% phonemes                | 23  | 5   | 6  | 42  | 79 (60-92)           | 89 (77-97)           |
| 6.                    | NRT            | 75% phonemes                | 37  | 4   | 7  | 37  | 84 (70-93)           | 90 (77-97)           |
| 8.                    | NRT            | 81% phonemes                | 103 | 145 | 61 | 272 | 63 (55-70)           | 65 (60-70)           |
| 10.                   | CNRep          | n/a                         | 21  | 0   | 1  | 22  | 96 (77-100)          | 100 (85-100)         |
| 12.                   | NRT            | 92% phonemes                | 8   | 4   | 5  | 14  | 62 (32-86)           | 78 (52-94)           |
|                       | NRT 3 syll.    | 98% phonemes                | 11  | 8   | 2  | 10  | 85 (55-98)           | 56 (31-79)           |
|                       | NRT 4 syll.    | 84% phonemes                | 9   | 6   | 4  | 12  | 69 (39-91)           | 67 (41-87)           |
| 13.                   | NRT            | 85% phonemes                | 19  | 2   | 1  | 18  | 95 (75-100)          | 90 (68-99)           |

<sup>a</sup> Study ID is based on the alphabetical list included in Table 1 and in the Appendix.

TP=true positive, FP=false positive, FN=false negative, TN=true negative, Sensitivity=TP/TP+FN, Specificity=TN/TN+FP, NRT=Nonword Repetition Test (Dollaghan & Campbell, 1998), CNRep=Children's Test of Nonword Repetition (Gathercole et al., 1994), NRT adj.= score adjusted by exclusion of out-of-inventory sounds, NRT 3/4 syll.=score based on 3 or 4 syllable words only.
