# Supplementary material
Source: publisher figshare collection journal article supplement (https://asha.figshare.com/articles/dataset/_/6170489)
Supplement: Supplementary file 5 [file 1]

### Studies Excluded From the Analysis

Additional studies were excluded for one of the following reasons: the study did not include age-matched groups of individuals with LI and TD (N = 1; Conti-Ramsden & Hesketh, 2003), the study did not include participants with LI or TD (N = 2; Nickisch & Kiese-Himmel, 2009; Miller & Wagstaff, 2011); the study did not include any of the three markers (N = 1; Klee, Gavin & Stokes, 2007), the study was a review (N = 3; Archibald, 2008; Bedore & Pena, 2008; Rice, 1997), the study was based on participants younger than 3 years (N = 1; Stokes & Klee, 2009), the study included some participants used in previous investigations (N = 1; Botting & Conti-Ramsen, 2003) or did not provide sufficient data to allow calculation of likelihood ratios (N = 5; Gardner Froud, McClelland, & van der Lely, 2006; Oetting & Cleveland, 2006; Oetting, Cleveland & Cope, 2008; Sturmer, Funk, & Green, 1996, Sturmer, Kunze, Funk, & Green, 1993).

### References

- Archibald, L. M. D. (2008). The promise of nonword repetition as clinical tool. *Canadian Journal of Speech-Language Pathology and Audiology*, 32, 21-28.
- Bedore, L. M., & Pena, E. D. (2008). Assessment of bilingual children for identification of language impairment: Current findings and implications for practice. *International Journal of Bilingual Education and Bilingualism*, 11, 1-29.
- Botting, N., & Conti-Ramsden, G. (2003). Autism, primary pragmatic difficulties, and specific language impairment: Can we distinguish them using psycholinguistic markers? *Developmental Medicine and Child Neurology*, 45, 515-524.

- Conti-Ramsden, G., & Hesketh, A. (2003). Risk markers for SLI: A study of young language-learning children. *International Journal of Language and Communication Disorders*, 38, 251-263.
- Gardner, H., Froud, K., McClelland, A., & van der Lely, H. K. J. (2006). Development of the Grammar and Phonology Screening (GAPS) test to assess key markers of specific language and literacy difficulties in young children. *International Journal of Language & Communication Disorders*, 41, 513-540.
- Klee, T., Gavin, W. J., & Stokes, S. F. (2007). Utterance length and lexical diversity in American- and British-English speaking children: What is the evidence for a clinical marker of SLI? In R. Paul, (Ed.). *Language disorders from a developmental perspective: Essays in honor of Robin S. Chapman* (pp. 103-140). Mahwah, NJ, Lawrence Erlbaum Associates Publishers.
- Miller, C. A., & Wagstaff, D. A. (2011). Behavioral profiles associated with auditory processing disorder and specific language impairment. *Journal of Communication Disorders*, 44, 745-763.
- Nickisch, A., & Kiese-Himmel, C. (2009). (Central) auditory processing disorders in 8- and 10-year-old children: which tests distinguish between normal and impaired children? *Laryngorhinootologie*, 88, 469-476.
- Oetting, J. B., & Cleveland, L. H. (2006). The clinical utility of nonword repetition for children living in the rural south of the US. *Clinical Linguistics & Phonetics*, 20, 553-561.
- Oetting, J. B., & Cleveland, L. H., & Cope, R. F. (2008). Empirically derived combinations of tools and clinical cutoffs: An illustrative case with a sample of

- culturally/linguistically diverse children. *Language, Speech, and Hearing Services in Schools*, 39, 44-53.
- Rice, M. L. (1997). Specific language impairment: In search of diagnostic markers and genetic contributions. *Mental Retardation and Developmental Disabilities Research Reviews*, 3, 350-357.
- Stokes, S. F., & Klee, T. (2009). The diagnostic accuracy of a new test of early nonword repetition for differentiating late talking and typically developing children. *Journal of Speech, Language, and Hearing Research*, 52, 872-882.
- Sturner, R.A., Funk, S.G., & Green, J.A. (1996). Preschool speech and language screening: further validation of the Sentence Repetition Screening Test. *Developmental and Behavioral Pediatrics*, 17, 405-413.
- Sturner, R.A., Kunze, L., Funk, S.G., & Green, J.A. (1993). Elicited imitation: its effectiveness for speech and language screening. *Developmental Medicine and Child Neurology*, 35, 715-726.
